# Supplementary material
Source: PubMed Central journal article supplement (PMC4820077)
Supplement: NIHMS770618-supplement-Supplement_A.pdf [file NIHMS770618-supplement-Supplement_A.pdf]

## Supplement A. Supplementary Tables For Applications

TABLE S1

Posterior mean (upper triangle) and 95% Bayesian credible interval (BCI - lower triangle) estimates for latent liability model correlations between antibiotic resistance traits in *Salmonella*.

|                   | Nalidixic acid | Ciprofloxacin | Furazolidone  | Kanamycin     | Trimethoprim  | Gentamicin    | Netilmicin    |
|-------------------|----------------|---------------|---------------|---------------|---------------|---------------|---------------|
| Nalidixic acid    | 1.00           | 0.34          | 0.10          | 0.16          | 0.24          | 0.20          | 0.16          |
| Ciprofloxacin     | [-0.07, 0.68]  | 1.00          | -0.20         | -0.15         | 0.06          | -0.20         | -0.23         |
| Furazolidone      | [-0.31, 0.48]  | [-0.73, 0.42] | 1.00          | 0.18          | 0.21          | 0.53          | 0.57          |
| Kanamycin         | [-0.22, 0.51]  | [-0.67, 0.45] | [-0.26, 0.56] | 1.00          | 0.52          | 0.41          | 0.42          |
| Trimethoprim      | [-0.10, 0.54]  | [-0.39, 0.50] | [-0.17, 0.55] | [0.23, 0.76]  | 1.00          | 0.20          | 0.21          |
| Gentamicin        | [-0.17, 0.54]  | [-0.75, 0.47] | [0.02, 0.84]  | [0.06, 0.71]  | [-0.16, 0.53] | 1.00          | 0.92          |
| Netilmicin        | [-0.21, 0.51]  | [-0.77, 0.42] | [0.06, 0.87]  | [0.06, 0.72]  | [-0.15, 0.53] | [0.80, 0.98]  | 1.00          |
| Spectinomycin     | [-0.13, 0.51]  | [-0.62, 0.42] | [0.04, 0.93]  | [-0.21, 0.54] | [-0.26, 0.43] | [0.28, 0.97]  | [0.30, 0.97]  |
| Chloramphenicol   | [-0.28, 0.41]  | [-0.73, 0.23] | [0.20, 0.97]  | [-0.07, 0.58] | [-0.13, 0.49] | [0.20, 0.98]  | [0.24, 0.98]  |
| Ampicillin        | [-0.33, 0.38]  | [-0.72, 0.28] | [0.10, 0.97]  | [-0.16, 0.57] | [-0.18, 0.49] | [-0.02, 0.95] | [0.01, 0.95]  |
| Tetracycline      | [-0.26, 0.44]  | [-0.69, 0.32] | [0.09, 0.97]  | [-0.16, 0.53] | [-0.19, 0.47] | [0.10, 0.97]  | [0.12, 0.97]  |
| Sulphamethoxazole | [-0.25, 0.55]  | [-0.63, 0.57] | [-0.15, 0.91] | [-0.16, 0.53] | [-0.13, 0.67] | [-0.19, 0.90] | [-0.17, 0.90] |
| Streptomycin      | [-0.17, 0.52]  | [-0.65, 0.42] | [0.00, 0.95]  | [-0.30, 0.64] | [-0.24, 0.46] | [0.15, 0.96]  | [0.17, 0.97]  |

|                   | Spectinomycin | Chloramphenicol | Ampicillin   | Tetracycline | Sulphamethoxazole | Streptomycin |
|-------------------|---------------|-----------------|--------------|--------------|-------------------|--------------|
| Nalidixic acid    | 0.21          | 0.07            | 0.04         | 0.10         | 0.18              | 0.19         |
| Ciprofloxacin     | -0.13         | -0.29           | -0.26        | -0.22        | -0.02             | -0.14        |
| Furazolidone      | 0.66          | 0.79            | 0.76         | 0.77         | 0.62              | 0.70         |
| Kanamycin         | 0.19          | 0.28            | 0.23         | 0.20         | 0.19              | 0.17         |
| Trimethoprim      | 0.10          | 0.20            | 0.18         | 0.16         | 0.30              | 0.13         |
| Gentamicin        | 0.78          | 0.70            | 0.58         | 0.66         | 0.46              | 0.72         |
| Netilmicin        | 0.79          | 0.75            | 0.63         | 0.70         | 0.49              | 0.74         |
| Spectinomycin     | 1.00          | 0.82            | 0.70         | 0.82         | 0.64              | 0.93         |
| Chloramphenicol   | [0.67, 0.92]  | 1.00            | 0.94         | 0.96         | 0.76              | 0.86         |
| Ampicillin        | [0.50, 0.85]  | [0.86, 0.98]    | 1.00         | 0.93         | 0.78              | 0.77         |
| Tetracycline      | [0.68, 0.92]  | [0.91, 0.98]    | [0.86, 0.98] | 1.00         | 0.82              | 0.89         |
| Sulphamethoxazole | [0.36, 0.85]  | [0.54, 0.91]    | [0.55, 0.92] | [0.63, 0.93] | 1.00              | 0.74         |
| Streptomycin      | [0.84, 0.98]  | [0.73, 0.94]    | [0.59, 0.89] | [0.78, 0.96] | [0.50, 0.91]      | 1.00         |

TABLE S2

*Posterior mean and 95% Bayesian credible interval (BCI) estimates for pairwise correlation between the host trait (Animal/Human) and the different antibiotic resistance traits.*

|                   | Correlation | 95% BCI            |
|-------------------|-------------|--------------------|
| Ampicillin        | 0.0349      | [-0.2357, 0.3036]  |
| Chloramphenicol   | -0.0610     | [-0.3055, 0.1903]  |
| Ciprofloxacin     | 0.1505      | [-0.3313, 0.6099]  |
| Gentamicin        | -0.3651     | [-0.6893, -0.0086] |
| Kanamycin         | -0.1578     | [-0.4641, 0.1715]  |
| Furazolidone      | 0.0001      | [-0.3131, 0.3098]  |
| Nalidixic acid    | -0.0967     | [-0.4199, 0.2439]  |
| Netilmicin        | -0.3315     | [-0.6551, 0.0145]  |
| Spectinomycin     | -0.2696     | [-0.5130, 0.0009]  |
| Streptomycin      | -0.1392     | [-0.4020, 0.1375]  |
| Sulphamethoxazole | 0.1399      | [-0.2104, 0.4768]  |
| Tetracycline      | -0.0142     | [-0.2716, 0.2471]  |
| Trimethoprim      | 0.0049      | [-0.2888, 0.2976]  |

TABLE S3

Posterior mean (upper triangle) and 95% Bayesian credible interval (BCI - lower triangle) estimates for latent liability model correlations between floral traits in *Aquilegia*.

|                  | Orientation    | Blade brightness | Spur brightness | Sepal length   | Blade length   | Pollinator     |
|------------------|----------------|------------------|-----------------|----------------|----------------|----------------|
| Orientation      | 1.00           | 0.54             | 0.42            | 0.50           | 0.55           | 0.74           |
| Blade brightness | [0.32; 0.73]   | 1.00             | 0.52            | 0.49           | 0.60           | 0.50           |
| Spur brightness  | [0.17; 0.64]   | [0.29; 0.71]     | 1.00            | 0.47           | 0.43           | 0.60           |
| Sepal length     | [0.26; 0.70]   | [0.26; 0.69]     | [0.22; 0.67]    | 1.00           | 0.74           | 0.64           |
| Blade length     | [0.33; 0.73]   | [0.39; 0.76]     | [0.17; 0.64]    | [0.60; 0.85]   | 1.00           | 0.55           |
| Pollinator       | [0.56; 0.87]   | [0.24; 0.70]     | [0.38; 0.77]    | [0.38; 0.83]   | [0.27; 0.78]   | 1.00           |
| Spur hue         | [0.14; 0.63]   | [0.09; 0.59]     | [0.38; 0.76]    | [0.19; 0.65]   | [0.14; 0.63]   | [0.74; 0.94]   |
| Spur length      | [0.34; 0.73]   | [0.08; 0.59]     | [0.17; 0.65]    | [0.47; 0.80]   | [0.47; 0.80]   | [0.60; 0.88]   |
| Blade hue        | [-0.14; 0.42]  | [-0.06; 0.49]    | [0.05; 0.57]    | [0.22; 0.67]   | [0.10; 0.60]   | [0.28; 0.75]   |
| Blade chroma     | [-0.71; -0.29] | [-0.75; -0.37]   | [-0.57; -0.06]  | [-0.55; -0.03] | [-0.55; -0.02] | [-0.56; -0.01] |
| Spur chroma      | [-0.76; -0.38] | [-0.84; -0.55]   | [-0.77; -0.41]  | [-0.64; -0.17] | [-0.67; -0.21] | [-0.70; -0.24] |
| Anthocyanins     | [-0.67; -0.19] | [-0.75; -0.34]   | [-0.68; -0.22]  | [-0.77; -0.30] | [-0.98; -0.83] | [-0.79; -0.27] |

|                  | Spur hue       | Spur length    | Blade hue      | Blade chroma  | Spur chroma  | Anthocyanins |
|------------------|----------------|----------------|----------------|---------------|--------------|--------------|
| Orientation      | 0.40           | 0.56           | 0.15           | -0.52         | -0.59        | -0.45        |
| Blade brightness | 0.36           | 0.35           | 0.22           | -0.58         | -0.71        | -0.57        |
| Spur brightness  | 0.59           | 0.43           | 0.33           | -0.33         | -0.61        | -0.47        |
| Sepal length     | 0.44           | 0.65           | 0.47           | -0.31         | -0.42        | -0.56        |
| Blade length     | 0.40           | 0.65           | 0.36           | -0.30         | -0.46        | -0.92        |
| Pollinator       | 0.86           | 0.76           | 0.54           | -0.30         | -0.49        | -0.56        |
| Spur hue         | 1.00           | 0.68           | 0.55           | -0.03         | -0.33        | -0.55        |
| Spur length      | [0.50; 0.81]   | 1.00           | 0.50           | -0.10         | -0.19        | -0.61        |
| Blade hue        | [0.33; 0.73]   | [0.26; 0.70]   | 1.00           | -0.28         | -0.21        | -0.34        |
| Blade chroma     | [-0.31; 0.26]  | [-0.38; 0.18]  | [-0.53; 0.00]  | 1.00          | 0.63         | 0.17         |
| Spur chroma      | [-0.57; -0.06] | [-0.45; 0.10]  | [-0.47; 0.07]  | [0.44; 0.79]  | 1.00         | 0.43         |
| Anthocyanins     | [-0.74; -0.32] | [-0.78; -0.39] | [-0.59; -0.05] | [-0.13; 0.45] | [0.16; 0.65] | 1.00         |

TABLE S4

Posterior mean (upper triangle) and 95% Bayesian credible interval (BCI - lower triangle) estimates for latent liability correlations between floral traits in *Aquilegia* not controlling for phylogenetic relatedness.

|                  | Orientation    | Blade brightness | Spur brightness | Sepal length   | Blade length   | Pollinator     |
|------------------|----------------|------------------|-----------------|----------------|----------------|----------------|
| Orientation      | 1.00           | 0.56             | 0.51            | 0.59           | 0.71           | 0.70           |
| Blade brightness | [0.35, 0.71]   | 1.00             | 0.53            | 0.52           | 0.60           | 0.44           |
| Spur brightness  | [0.28, 0.67]   | [0.30, 0.68]     | 1.00            | 0.58           | 0.60           | 0.60           |
| Sepal length     | [0.38, 0.73]   | [0.28, 0.67]     | [0.37, 0.72]    | 1.00           | 0.78           | 0.74           |
| Blade length     | [0.55, 0.82]   | [0.40, 0.74]     | [0.40, 0.74]    | [0.65, 0.86]   | 1.00           | 0.66           |
| Pollinator       | [0.51, 0.82]   | [0.17, 0.62]     | [0.39, 0.74]    | [0.55, 0.86]   | [0.44, 0.80]   | 1.00           |
| Spur length      | [0.13, 0.58]   | [-0.02, 0.47]    | [0.28, 0.67]    | [0.34, 0.70]   | [0.22, 0.64]   | [0.81, 0.94]   |
| Blade hue        | [0.34, 0.71]   | [0.027, 0.50]    | [0.25, 0.65]    | [0.52, 0.80]   | [0.53, 0.80]   | [0.74, 0.91]   |
| Blade chroma     | [-0.06, 0.43]  | [-0.04, 0.45]    | [0.12, 0.57]    | [0.40, 0.74]   | [0.18, 0.61]   | [0.48, 0.81]   |
| Spur chroma      | [-0.67, -0.27] | [-0.79, -0.50]   | [-0.57, -0.12]  | [-0.54, -0.08] | [-0.56, -0.11] | [-0.41, 0.11]  |
| Anthocyanins     | [-0.77, -0.46] | [-0.84, -0.60]   | [-0.78, -0.48]  | [-0.64, -0.24] | [-0.71, -0.35] | [-0.63, -0.20] |
|                  | [-0.78, -0.46] | [-0.73, -0.37]   | [-0.78, -0.46]  | [-0.82, -0.48] | [-0.98, -0.88] | [-0.86, -0.54] |

  

|                  | Spur hue       | Spur length    | Blade hue      | Blade chroma  | Spur chroma  | Anthocyanins |
|------------------|----------------|----------------|----------------|---------------|--------------|--------------|
| Orientation      | 0.39           | 0.562          | 0.22           | -0.457        | -0.61        | -0.62        |
| Blade brightness | 0.26           | 0.304          | 0.24           | -0.637        | -0.72        | -0.54        |
| Spur brightness  | 0.51           | 0.490          | 0.38           | -0.326        | -0.63        | -0.61        |
| Sepal length     | 0.56           | 0.693          | 0.60           | -0.288        | -0.43        | -0.65        |
| Blade length     | 0.47           | 0.697          | 0.43           | -0.321        | -0.52        | -0.93        |
| Pollinator       | 0.89           | 0.846          | 0.68           | -0.121        | -0.40        | -0.70        |
| Spur hue         | 1.00           | 0.798          | 0.70           | 0.150         | -0.20        | -0.63        |
| Spur length      | [0.68, 0.87]   | 1.000          | 0.63           | 0.061         | -0.15        | -0.72        |
| Blade hue        | [0.53, 0.80]   | [0.43, 0.75]   | 1.00           | -0.136        | -0.17        | -0.45        |
| Blade chroma     | [-0.14, 0.37]  | [-0.23, 0.28]  | [-0.41, 0.09]  | 1.000         | 0.68         | 0.16         |
| Spur chroma      | [-0.46, 0.02]  | [-0.42, 0.08]  | [-0.44, 0.05]  | [0.50, 0.79]  | 1.00         | 0.47         |
| Anthocyanins     | [-0.79, -0.47] | [-0.85, -0.60] | [-0.67, -0.25] | [-0.14, 0.39] | [0.21, 0.64] | 1.00         |

Table S5: Posterior mean and 95% Bayesian credible interval (BCI) estimates for significant correlations between sites in Influenza epitopes A and B.

| Sites | Correlation                | 95% BCI                    |
|-------|----------------------------|----------------------------|
| 1     | [156(K)Q EpB, 158(E)K EpB] | 0.7432 [0.3999, 0.9284]    |
| 2     | [158(E)N EpB, 189(S)K EpB] | 0.7365 [0.2806, 0.9499]    |
| 3     | [144(V)N EpA, 158(E)K EpB] | 0.7204 [0.3469, 0.9249]    |
| 4     | [133(D)N EpA, 144(V)N EpA] | 0.7180 [0.2908, 0.9391]    |
| 5     | [159(Y)F EpB, 189(S)N EpB] | 0.6913 [0.2655, 0.9174]    |
| 6     | [144(V)I EpA, 156(K)Q EpB] | 0.6883 [0.2880, 0.9161]    |
| 7     | [133(D)N EpA, 158(E)K EpB] | 0.6849 [0.2355, 0.9360]    |
| 8     | [144(V)N EpA, 145(N)S EpA] | 0.6826 [0.1411, 0.9304]    |
| 9     | [131(A)T EpA, 159(Y)F EpB] | 0.6792 [0.1932, 0.9353]    |
| 10    | [145(N)S EpA, 188(D)Y EpB] | 0.6726 [0.2276, 0.9137]    |
| 11    | [144(V)N EpA, 188(D)Y EpB] | 0.6640 [0.0368, 0.9332]    |
| 12    | [144(V)N EpA, 156(K)Q EpB] | 0.6602 [0.2393, 0.9076]    |
| 13    | [159(Y)F EpB, 189(S)K EpB] | 0.6586 [0.1364, 0.9346]    |
| 14    | [156(K)H EpB, 159(Y)F EpB] | 0.6585 [0.1583, 0.9204]    |
| 15    | [158(E)K EpB, 188(D)Y EpB] | 0.6534 [1.503e-05, 0.9262] |
| 16    | [144(V)N EpA, 144(V)D EpA] | 0.6523 [0.0478, 0.9326]    |
| 17    | [144(V)D EpA, 158(E)K EpB] | 0.6516 [0.1447, 0.9094]    |
| 18    | [131(A)T EpA, 156(K)H EpB] | 0.6500 [0.1195, 0.9357]    |
| 19    | [156(K)H EpB, 189(S)N EpB] | 0.6381 [0.1477, 0.9119]    |
| 20    | [144(V)N EpA, 156(K)H EpB] | 0.6376 [0.0889, 0.9335]    |
| 21    | [133(D)N EpA, 156(K)Q EpB] | 0.6343 [0.1697, 0.9142]    |
| 22    | [133(D)N EpA, 156(K)H EpB] | 0.6328 [0.0869, 0.9432]    |
| 23    | [145(N)S EpA, 156(K)H EpB] | 0.6324 [0.0278, 0.9333]    |
| 24    | [133(D)N EpA, 144(V)D EpA] | 0.6320 [0.0886, 0.9170]    |
| 25    | [144(V)I EpA, 158(E)K EpB] | 0.6291 [0.1824, 0.8998]    |
| 26    | [145(N)S EpA, 198(A)S EpB] | 0.6195 [0.1026, 0.9115]    |
| 27    | [156(K)H EpB, 198(A)S EpB] | 0.6192 [0.0813, 0.9172]    |
| 28    | [158(E)N EpB, 159(Y)F EpB] | 0.6192 [0.0549, 0.9204]    |
| 29    | [133(D)N EpA, 145(N)S EpA] | 0.6190 [0.0058, 0.9267]    |
| 30    | [189(S)K EpB, 193(S)Y EpB] | 0.6138 [0.0330, 0.9231]    |
| 31    | [131(A)T EpA, 189(S)N EpB] | 0.6047 [0.0788, 0.9113]    |
| 32    | [131(A)T EpA, 189(S)K EpB] | 0.6030 [0.0881, 0.9200]    |
| 33    | [144(V)D EpA, 156(K)Q EpB] | 0.5898 [0.0680, 0.8939]    |
| 34    | [159(Y)F EpB, 198(A)S EpB] | 0.5780 [0.0158, 0.9013]    |

Continues on next page

Table S5: Posterior mean and 95% Bayesian credible interval (BCI) estimates for significant correlations between sites in Influenza epitopes A and B.

| Sites                         | Correlation | 95% BCI          |
|-------------------------------|-------------|------------------|
| 35 [145(N)S EpA, 158(E)K EpB] | 0.5774      | [0.0008, 0.8927] |
| 36 [144(V)K EpA, 189(S)K EpB] | 0.5738      | [0.0089, 0.9101] |
| 37 [131(A)T EpA, 158(E)N EpB] | 0.5652      | [0.0013, 0.9056] |
| 38 [133(D)N EpA, 197(R)Q EpB] | 0.5644      | [0.0600, 0.8911] |
| 39 [189(S)K EpB, 193(S)F EpB] | 0.5149      | [0.0128, 0.8652] |
| 40 [131(A)T EpA, 193(S)F EpB] | 0.4865      | [0.0112, 0.8355] |
| 41 [159(Y)F EpB, 193(S)F EpB] | 0.4849      | [0.0015, 0.8354] |

-

\*The code for sites is as follows: of the number of the amino acid site in the aligned sequence; the one letter code for the reference amino acid for the site in parenthesis; the code for the amino acid corresponding to the latent trait; and the epitope to which the site belongs.
